# Supplementary material
Source: PubMed Central journal article supplement (PMC8598376)

**Supplemental Figure S1. Pattern of HER2 amplification in the subset of HER2 heterogeneous tumors.** Heatmap generated using data from central pathology evaluation of HER2 heterogeneity. The graphic includes patients classified as HER2 heterogeneous depicted in each row. The color code to the right of the heatmap refers to the percentage of HER2 amplified cells per core biopsy tumor area. Core biopsy tumor areas, A, B and C were obtained from core biopsy site 1 and D, E and F from core biopsy site 2.

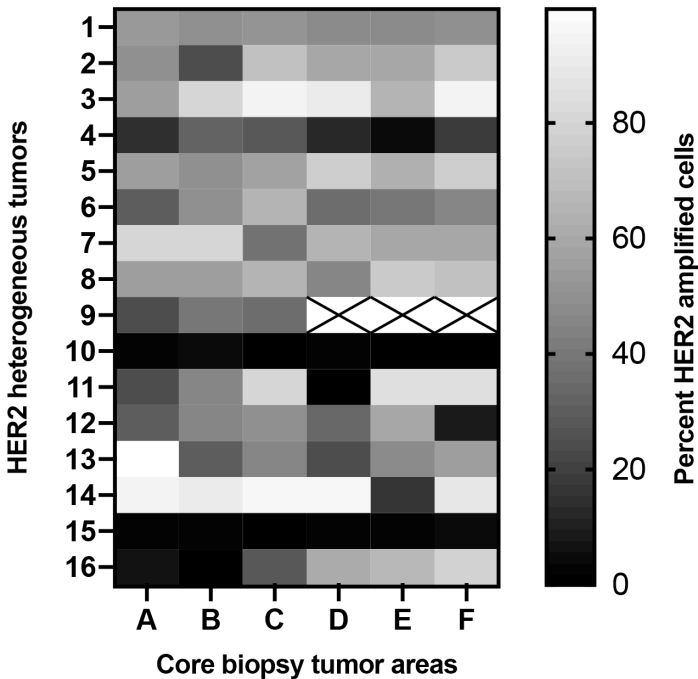

Supplement: NIHMS1702955-supplement-5.pdf [file NIHMS1702955-supplement-5.pdf]
