# Supplementary material
Source: PubMed Central journal article supplement (PMC8598376)

**Supplementary Figure S2. Assessment of HER2 copy number dispersion. A,** The Gini coefficient measuring the dispersion of HER2/CEP17 ratio in each patient. P-value is from a Kolmogorov-Smirnov test. **B,** Association between the Gini coefficient and Shannon equitability index in each patient. R and p-value are from a Pearson correlation test of association. **C,** Association between the Gini coefficient and percent of HER2 non-amplified cells in each patient. R and p-value are from a Pearson correlation test of association. **A-C,** Red represents patients without pCR and blue represents patients with pCR.

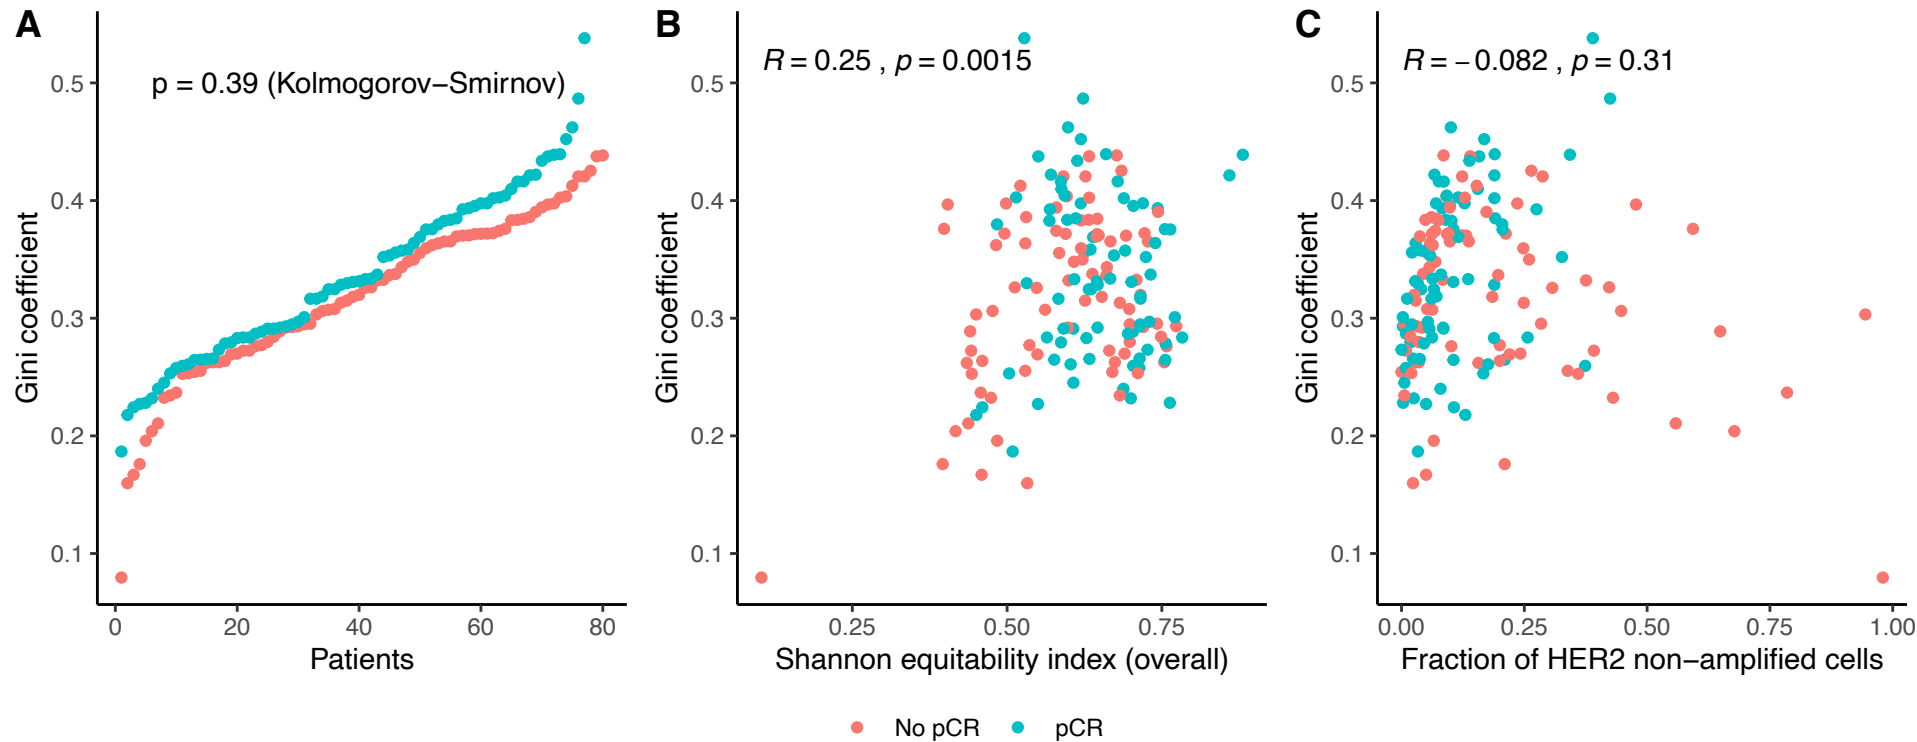

Supplement: NIHMS1702955-supplement-6.pdf [file NIHMS1702955-supplement-6.pdf]
