# Supplementary material
Source: PubMed Central journal article supplement (PMC8598376)
Supplement: NIHMS1702955-supplement-7.pdf [file NIHMS1702955-supplement-7.pdf]

**Supplementary Figure S3. Assessment of spatial HER2 heterogeneity. A**, The maximum area fraction of HER2 non-amplified cells in each patient. P-value is from a Wilcoxon test. The lower and upper hinges correspond to the 1st and 3rd quartiles, respectively. The lower and upper whiskers extend to the smallest and largest values, respectively, no further than  $1.5 \times \text{IQR}$  from the hinge, where the IQR is the distance between the 1st and 3rd quartiles. All data points are plotted. **B**, Association between the minimum and maximum area fractions of HER2 non-amplified cells in each patient. R and p-value are from a Pearson correlation test of association. **C**, Association between the overall and minimum area fractions of HER2 non-amplified cells in each patient. R and p-value are from a Pearson correlation test of association. **D**, Association between the overall and maximum area frequencies of HER2 non-amplified cells in each patient. R and p-value are from a Pearson correlation test of association. **A-D**, Red represents patients without pCR and blue represents patients with pCR.

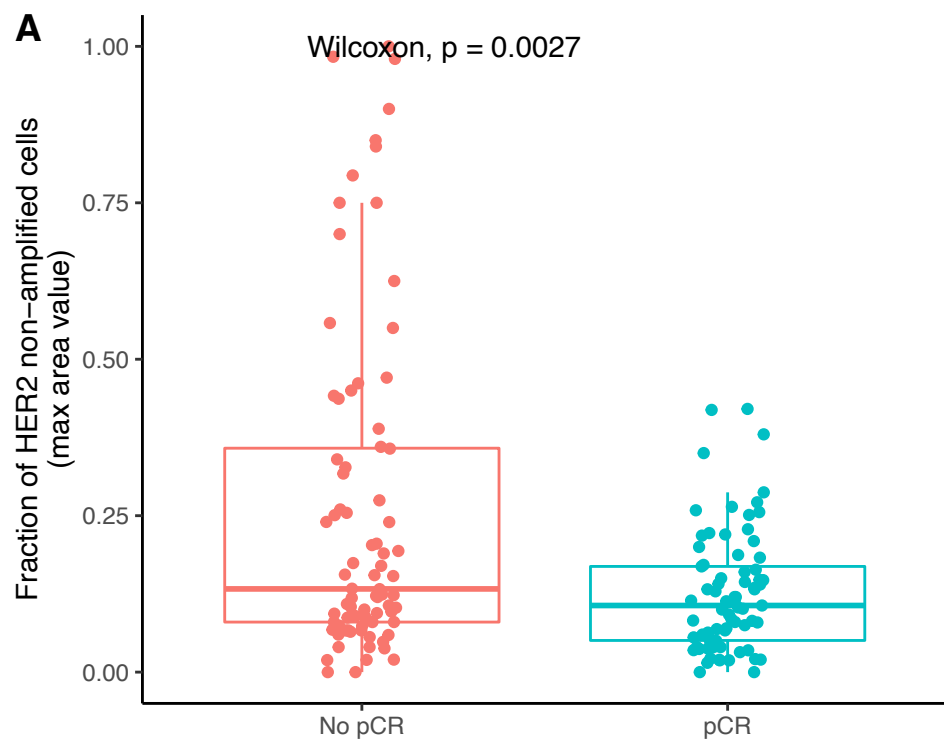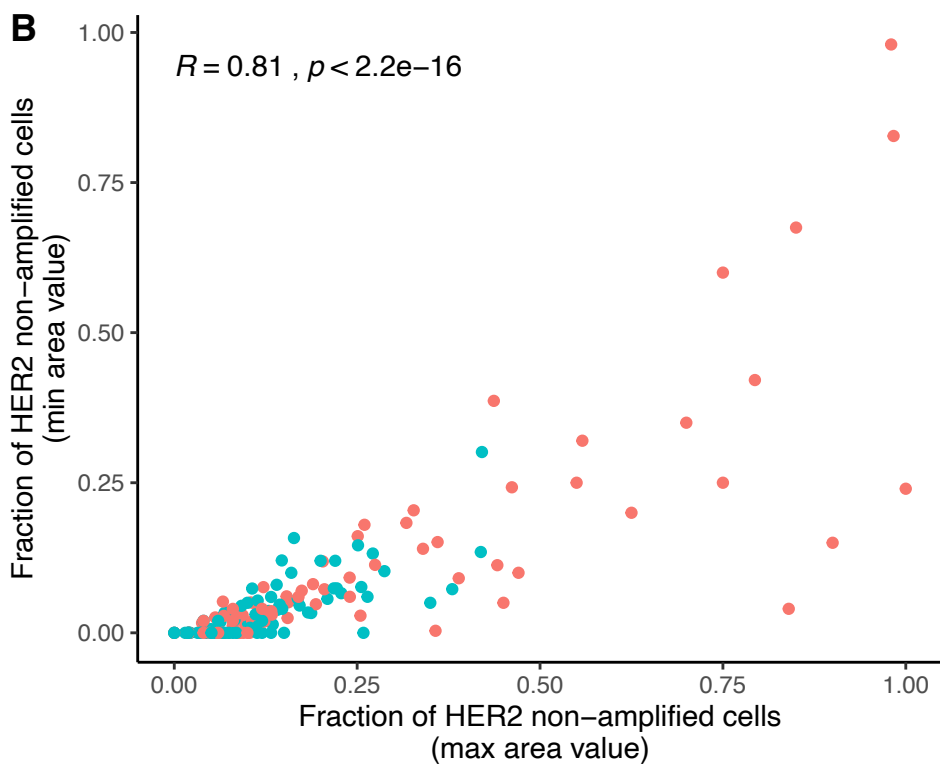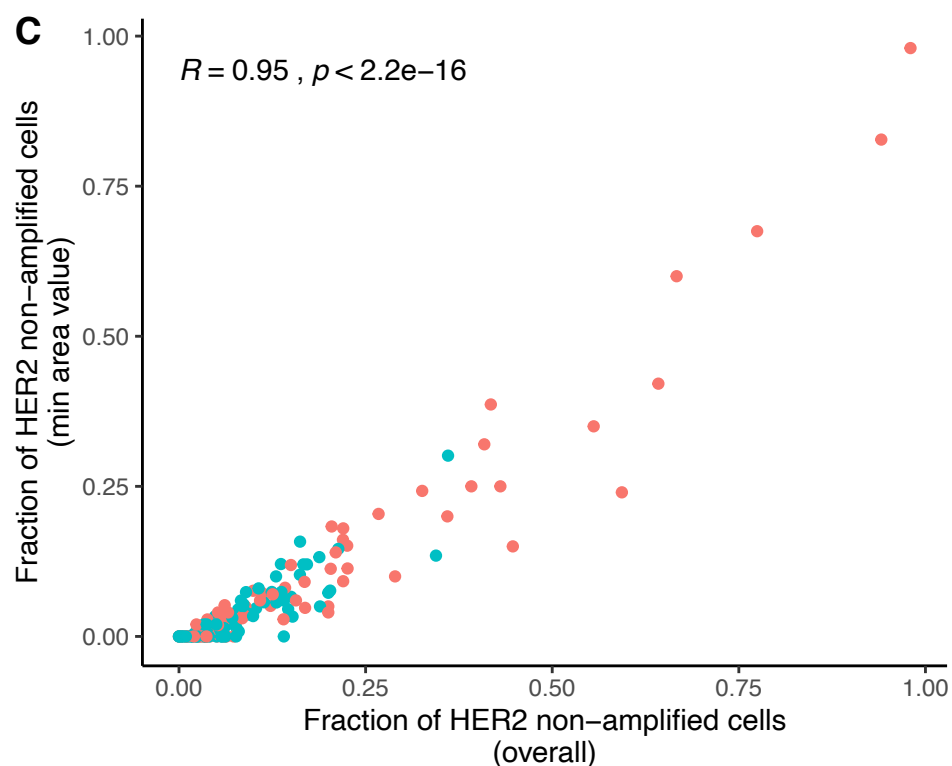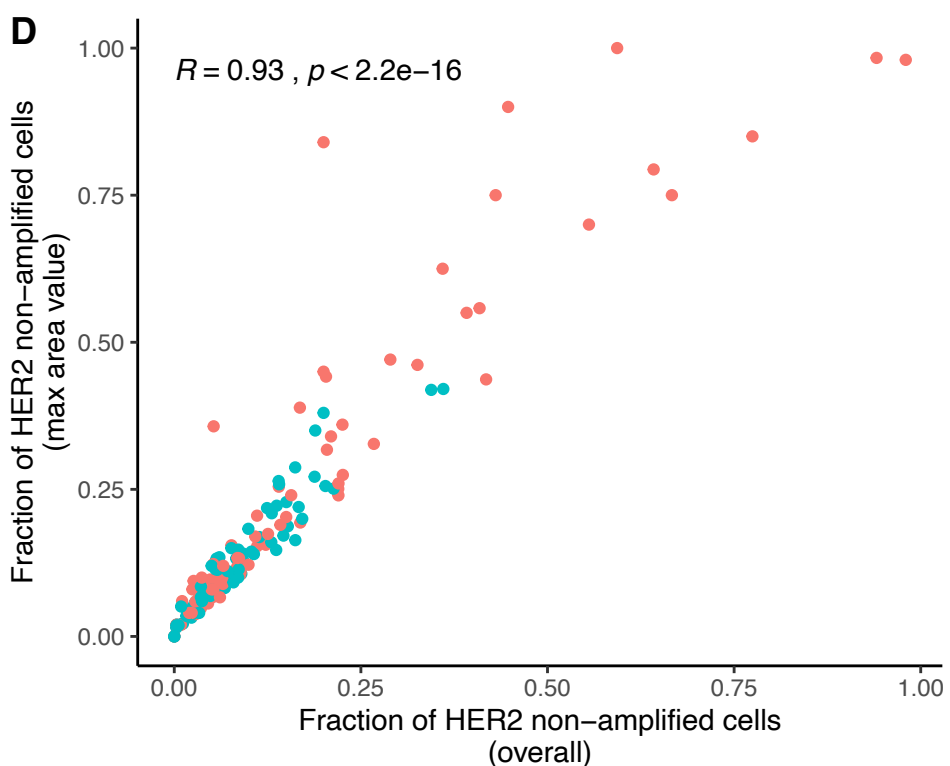

 No pCR
  pCR
