# Supplementary material
Source: PubMed Central journal article supplement (PMC8598376)

**Supplementary Figure S4. Relationship between *ERBB2* copy number and pCR.** **A**, Median HER2/CEP17 ratio for the overall population according to pCR results. P-value is from a Wilcoxon test. **B**, Median HER2/CEP17 ratio for the hormone receptor-positive and hormone receptor-negative subsets according to pCR results. P-value is from a Wilcoxon test. **C**, Median HER2/CEP17 ratio for each of the six core biopsy areas from each tumor and association with pCR. **A-C**, Red represents patients without pCR, and blue represents patients with pCR.

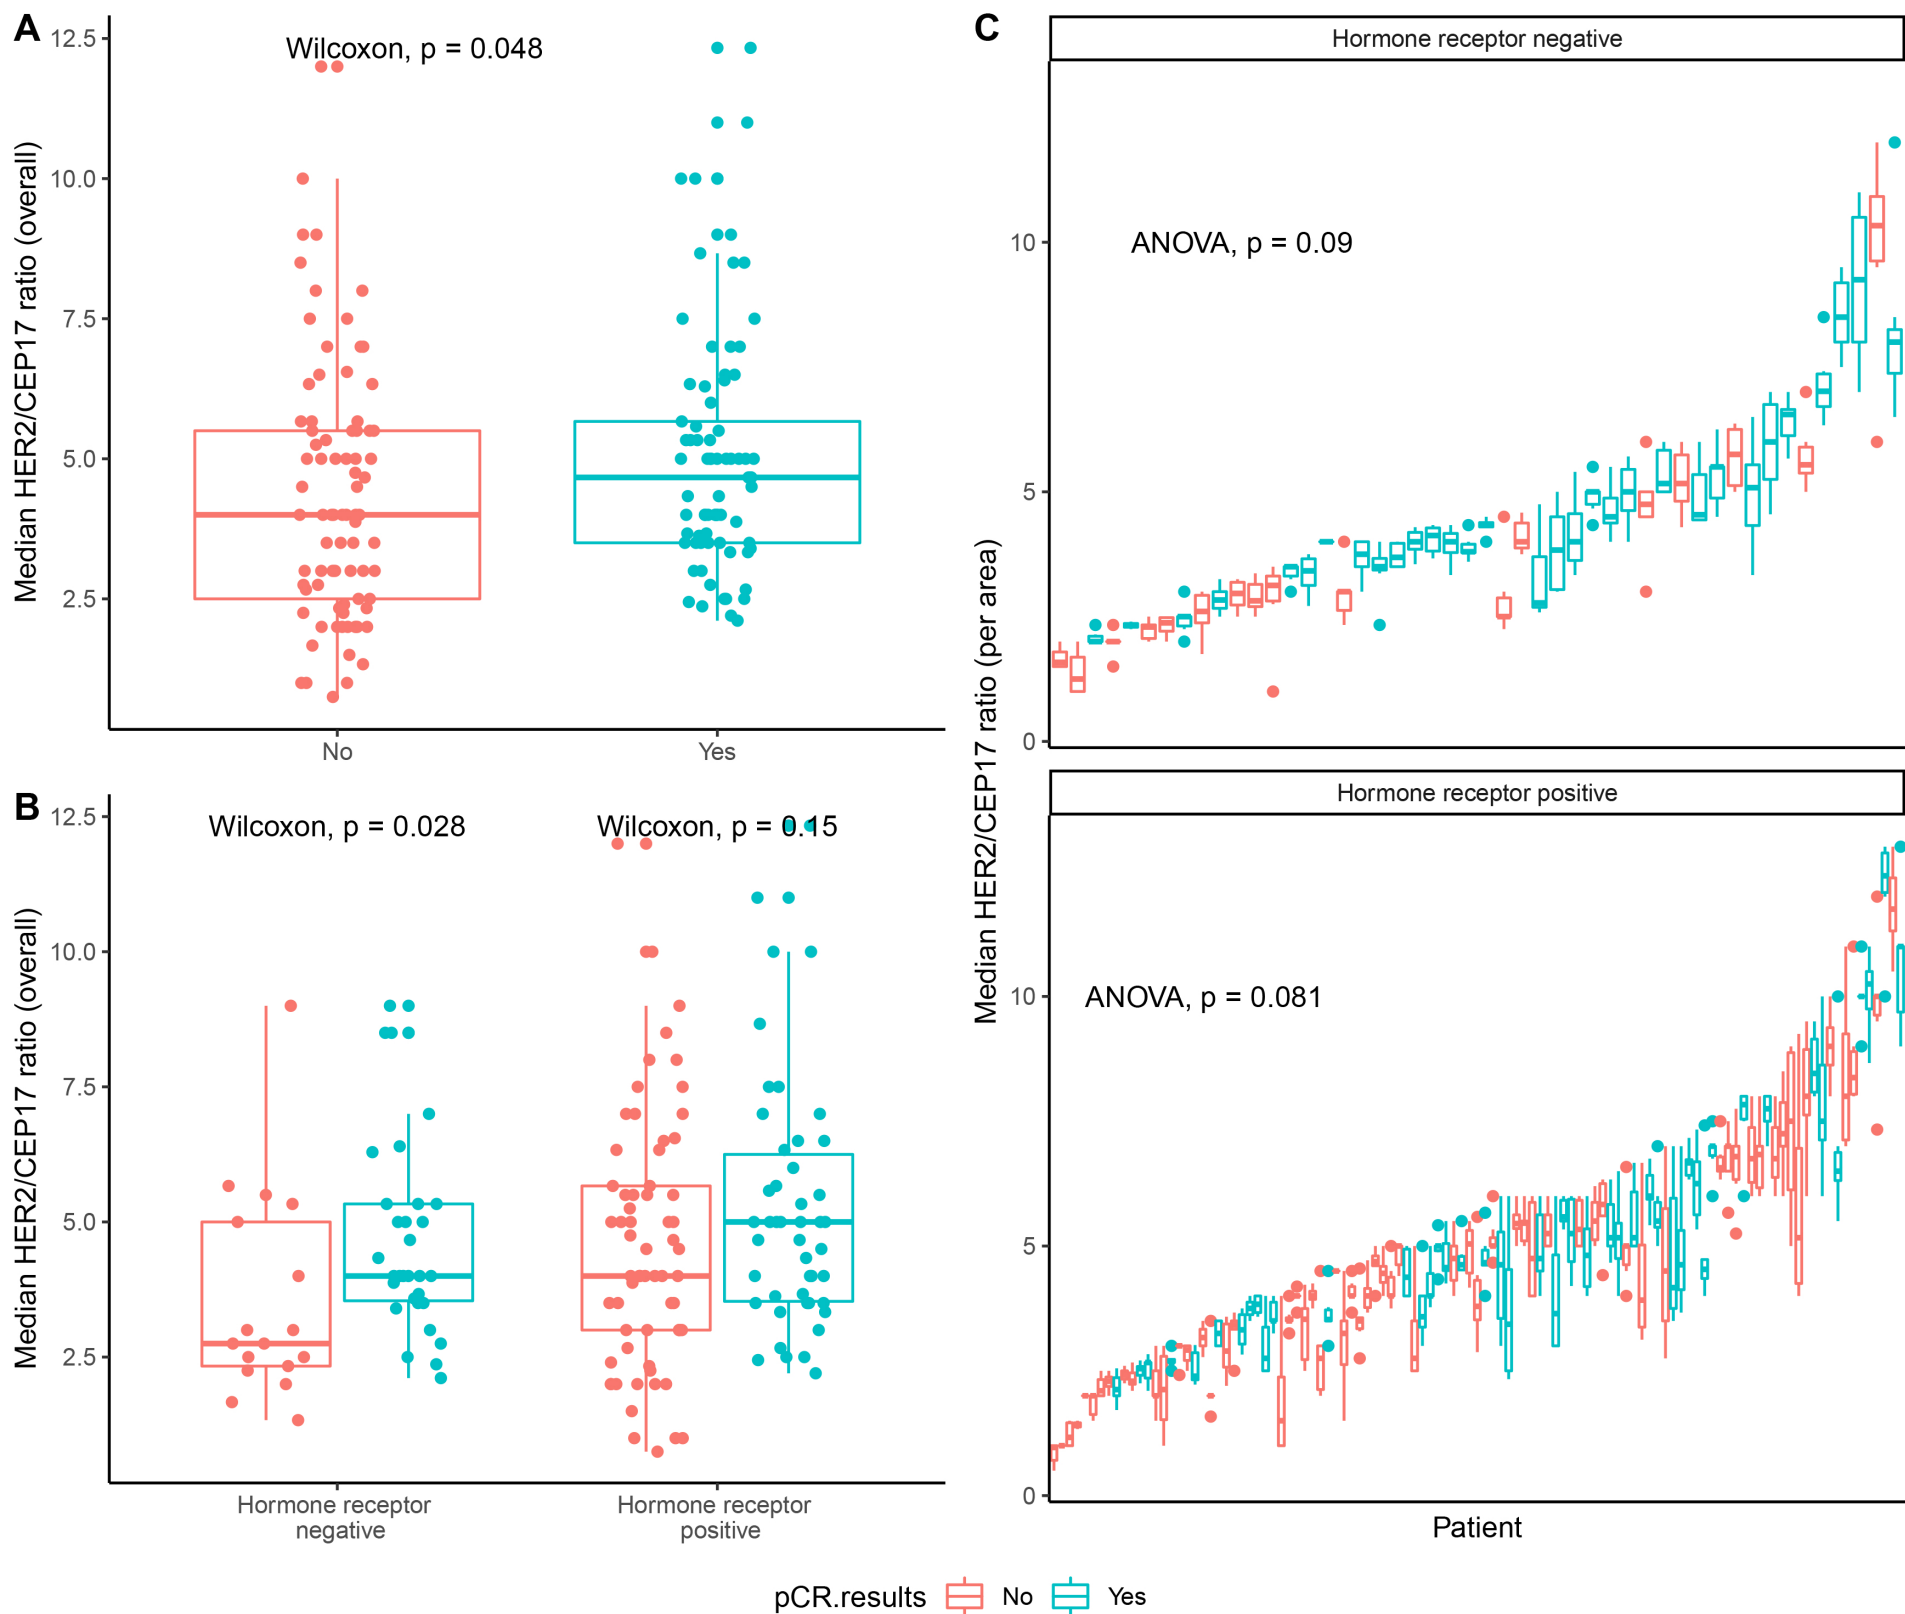

Supplement: NIHMS1702955-supplement-8.pdf [file NIHMS1702955-supplement-8.pdf]
