# Supplementary material
Source: PubMed Central journal article supplement (PMC8598376)

**Supplementary Figure S5. Predicting pathological complete response (pCR) from single cell HER2 FISH and clinical data.** **A**, Receiver operating characteristic (ROC) curves for the prediction models using the frequency of HER2 unamplified cells to predict pathological response. Blue: the model results using all patients, green: model results for the subset of hormone receptor positive cases, and orange: model results for the subset of hormone receptor negative cases. AUC is the area under the corresponding ROC curve. **B**, ROC curves for the logistic regression models 1 (blue), 2 (orange), 3 (green), 4 (red), 5 (purple), 6 (brown), 7 (pink) to predict pathological response. AUC is the area under the corresponding ROC curve.

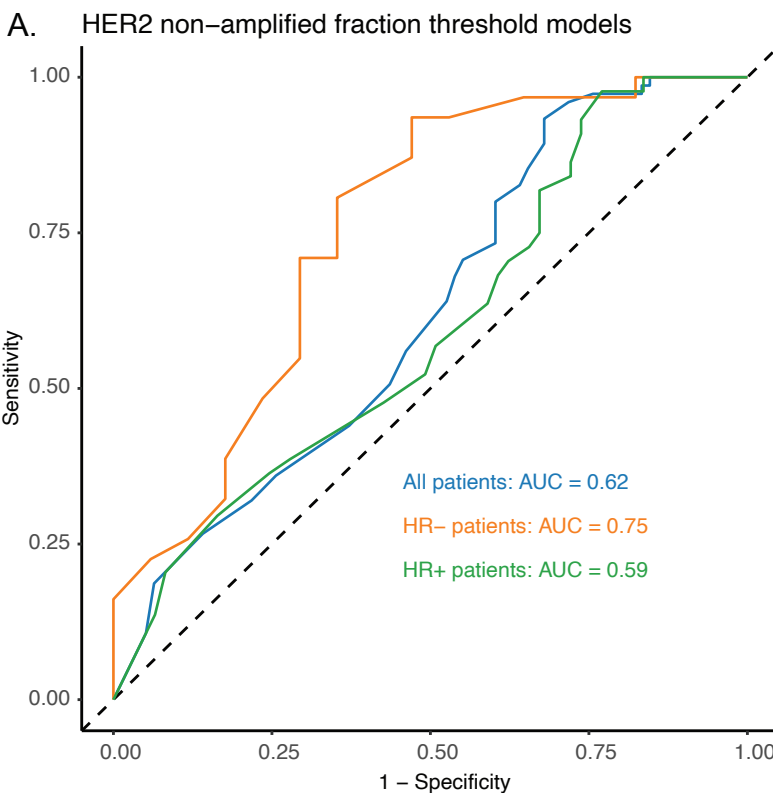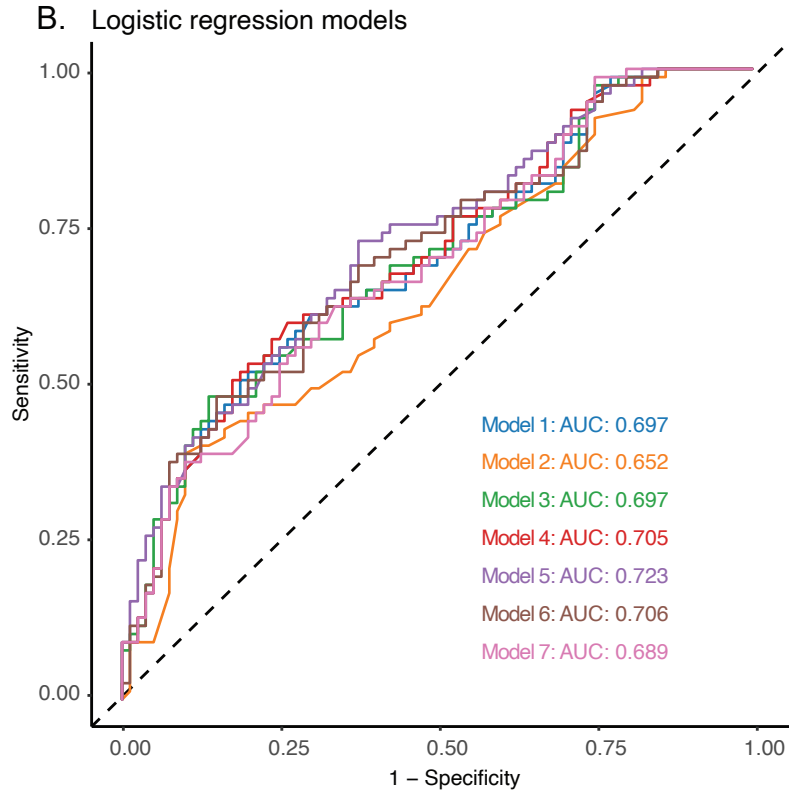

Supplement: NIHMS1702955-supplement-9.pdf [file NIHMS1702955-supplement-9.pdf]
