# Supplementary material
Source: PubMed Central journal article supplement (PMC8598376)

**Supplemental Figure S6. Logistic regression model calibration. A, Model 1. B, Model 2. C, Model 3. D, Model 4. E, Model 5. F, Model 6. G, Model 7. A-G, Calibration curves with summary statistics.** Dxy is the Somer's rank correlation between the predicted and observed values; C (ROC) is the area under the curve; R2 is the Nagelkerke-Cox-Snell-Maddala-Magee R-squared index; D is the discrimination index; U is the Unreliability index; Q is the Quality index; the Brier score is the average squared difference in the predicted and observed values; Emax is the maximum absolute difference in predicted and loess-calibrated probabilities; Eavg is the average absolute difference in predicted and loess-calibrated probabilities; E90 is the 0.9 quantile of the absolute difference in predicted and loess-calibrated probabilities; S:z and S:p are the Spiegelhalter Z-test for calibration accuracy and its two-tailed p-value.

**A. Model 1**

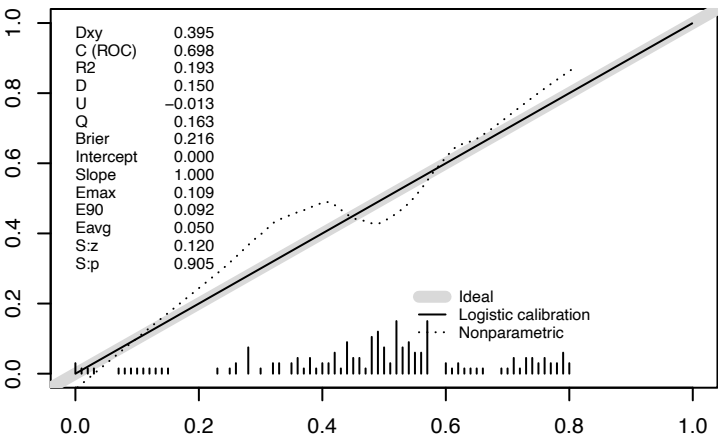

**B. Model 2**

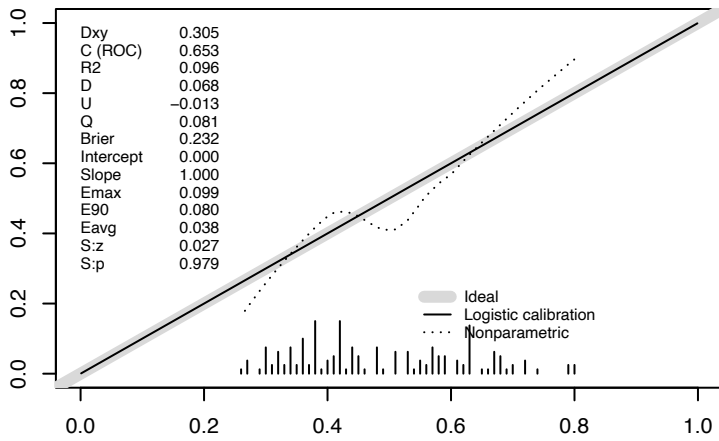

**C. Model 3**

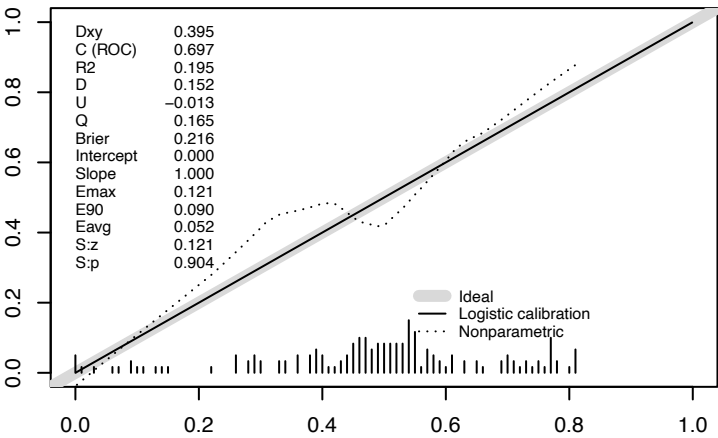

**D. Model 4**

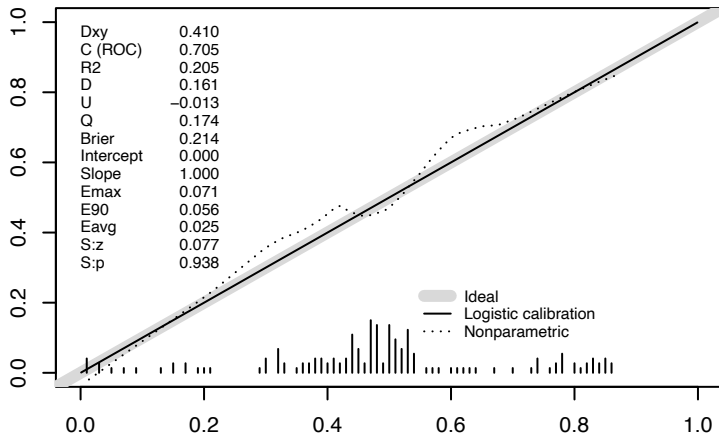

**E. Model 5**

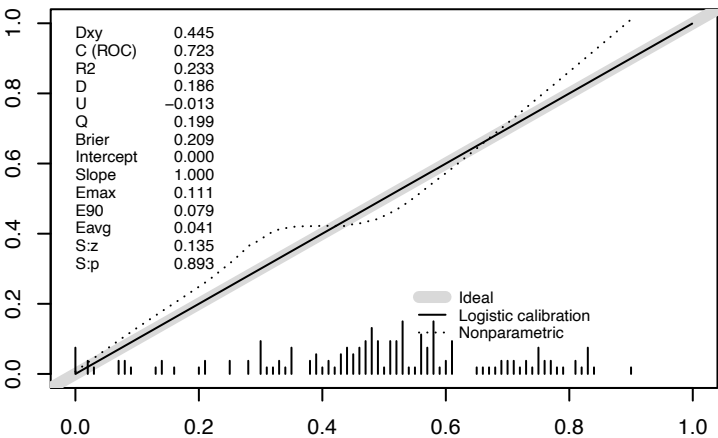

**F. Model 6**

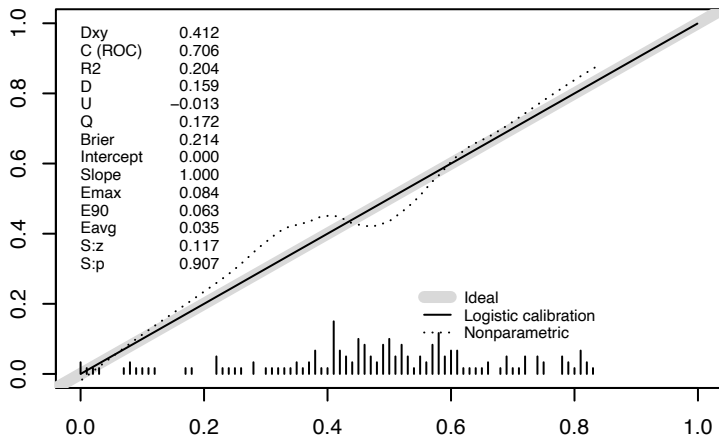

**G. Model 7**

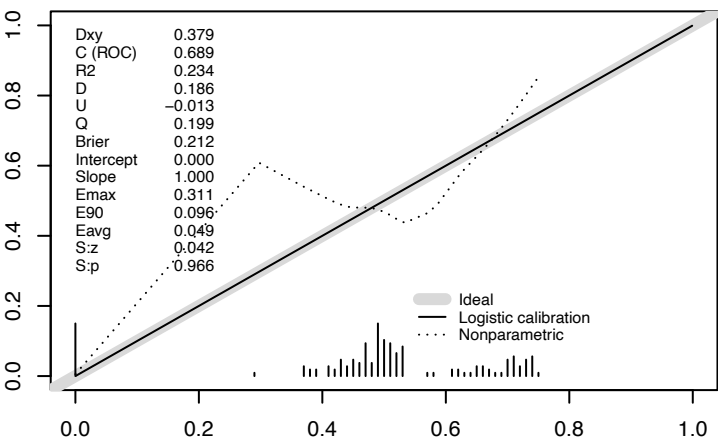

Supplement: NIHMS1702955-supplement-10.pdf [file NIHMS1702955-supplement-10.pdf]
